# Supplementary material for: One-step self-assembly organometallic molecular cages from 11 components
Source: Royal Society of Chemistry journal article supplement (doi:10.1039/b007658i), 2001-01-01
Supplement: b007658i.doc [file b007658i.doc]

# **Supporting information**

Route A: A mixture of [(CO)3ReOTf]2(-BPM) (300 mg, 0.30 mmol) and TEPB (76 mg, 0.20 mmol) in 40-ml THF was refluxed under Ar for 3 days. The reddish precipitate was collected on a frit, washed with 20-ml diethyl ether and dried in *vacuo*. Yield: 86%. IR (CO, CH3CN, cm-1): 2045, 1955. **H NMR (360 MHz, DMSO-*d*6): 9.94 (d, 3*J*HH = 5.5 Hz, 12 H, H-BPM), 8.48 (t, 3*J*HH = 5.7 Hz, 6 H, H-BPM), 8.32 (d, 3*J*HH = 6.4 Hz, 12 H, H-TEPB), 7.63 (s, 6 H, Ph-TEPB), 7.28 (d, 3*J*HH = 6.5 Hz, 12 H, H-TEPB). ESI-MS: *m/z* 3604.2 (calc. *m/z* 3604.1 for [M – OTf]+). Anal. Calc for C102H48N18O36Re6F18S6: C 32.64, H 1.29, N 6.72. Found: C 32.84, H 1.16, N 6.56 %. Cage **3** was prepared in the same way with 71% yield. IR (CO, CH3CN, cm-1): 2046, 1956. **H NMR (360 MHz, DMSO-*d*6): 10.09 (d, 3*J*HH = 5.5 Hz, 12 H, H-BPM), 8.57 (t, 3*J*HH = 5.5 Hz, 6 H, H-BPM), 8.50 (d, 3*J*HH = 6.0 Hz, 12 H, H-TPTA), 8.26 (d, 3*J*HH = 6.2 Hz, 12 H, H-TPTA). ESI-MS: *m/z* 1735.2 (calc. m/z for 1734.9 [M – OTf + H]2+). Anal. Calc for C84H42N24O36Re6F18S6: C 27.86, H 1.17, N 9.29. Found: C 28.16, H 1.01, N 9.38 %.

Route B: A mixture of (OTf)Re(CO)5  (200 mg, 0.42 mmol), BPM (33 mg, 0.21 mmol) and TEPB (53 mg, 0.14 mmol) in 40-ml THF was refluxed under Ar for 7 days. The precipitate was collected on a frit, washed with 20-ml diethyl ether and the solid was redissolved in 10-ml CH3CN and filtered to remove any insoluble materials. The filtrate was then added into a rapid stirring diethyl ether (200 ml) to precipitate the desired crude product. Recrystallization from CH3CN/diethyl ether afforded **2** in 47% yield. Cage **3** was prepared in the same manner as **2** with 41% yield.
