# Supplementary figures and images for: One-step self-assembly organometallic molecular cages from 11 components
Source: Royal Society of Chemistry journal article supplement (doi:10.1039/b007658i), 2001-01-01

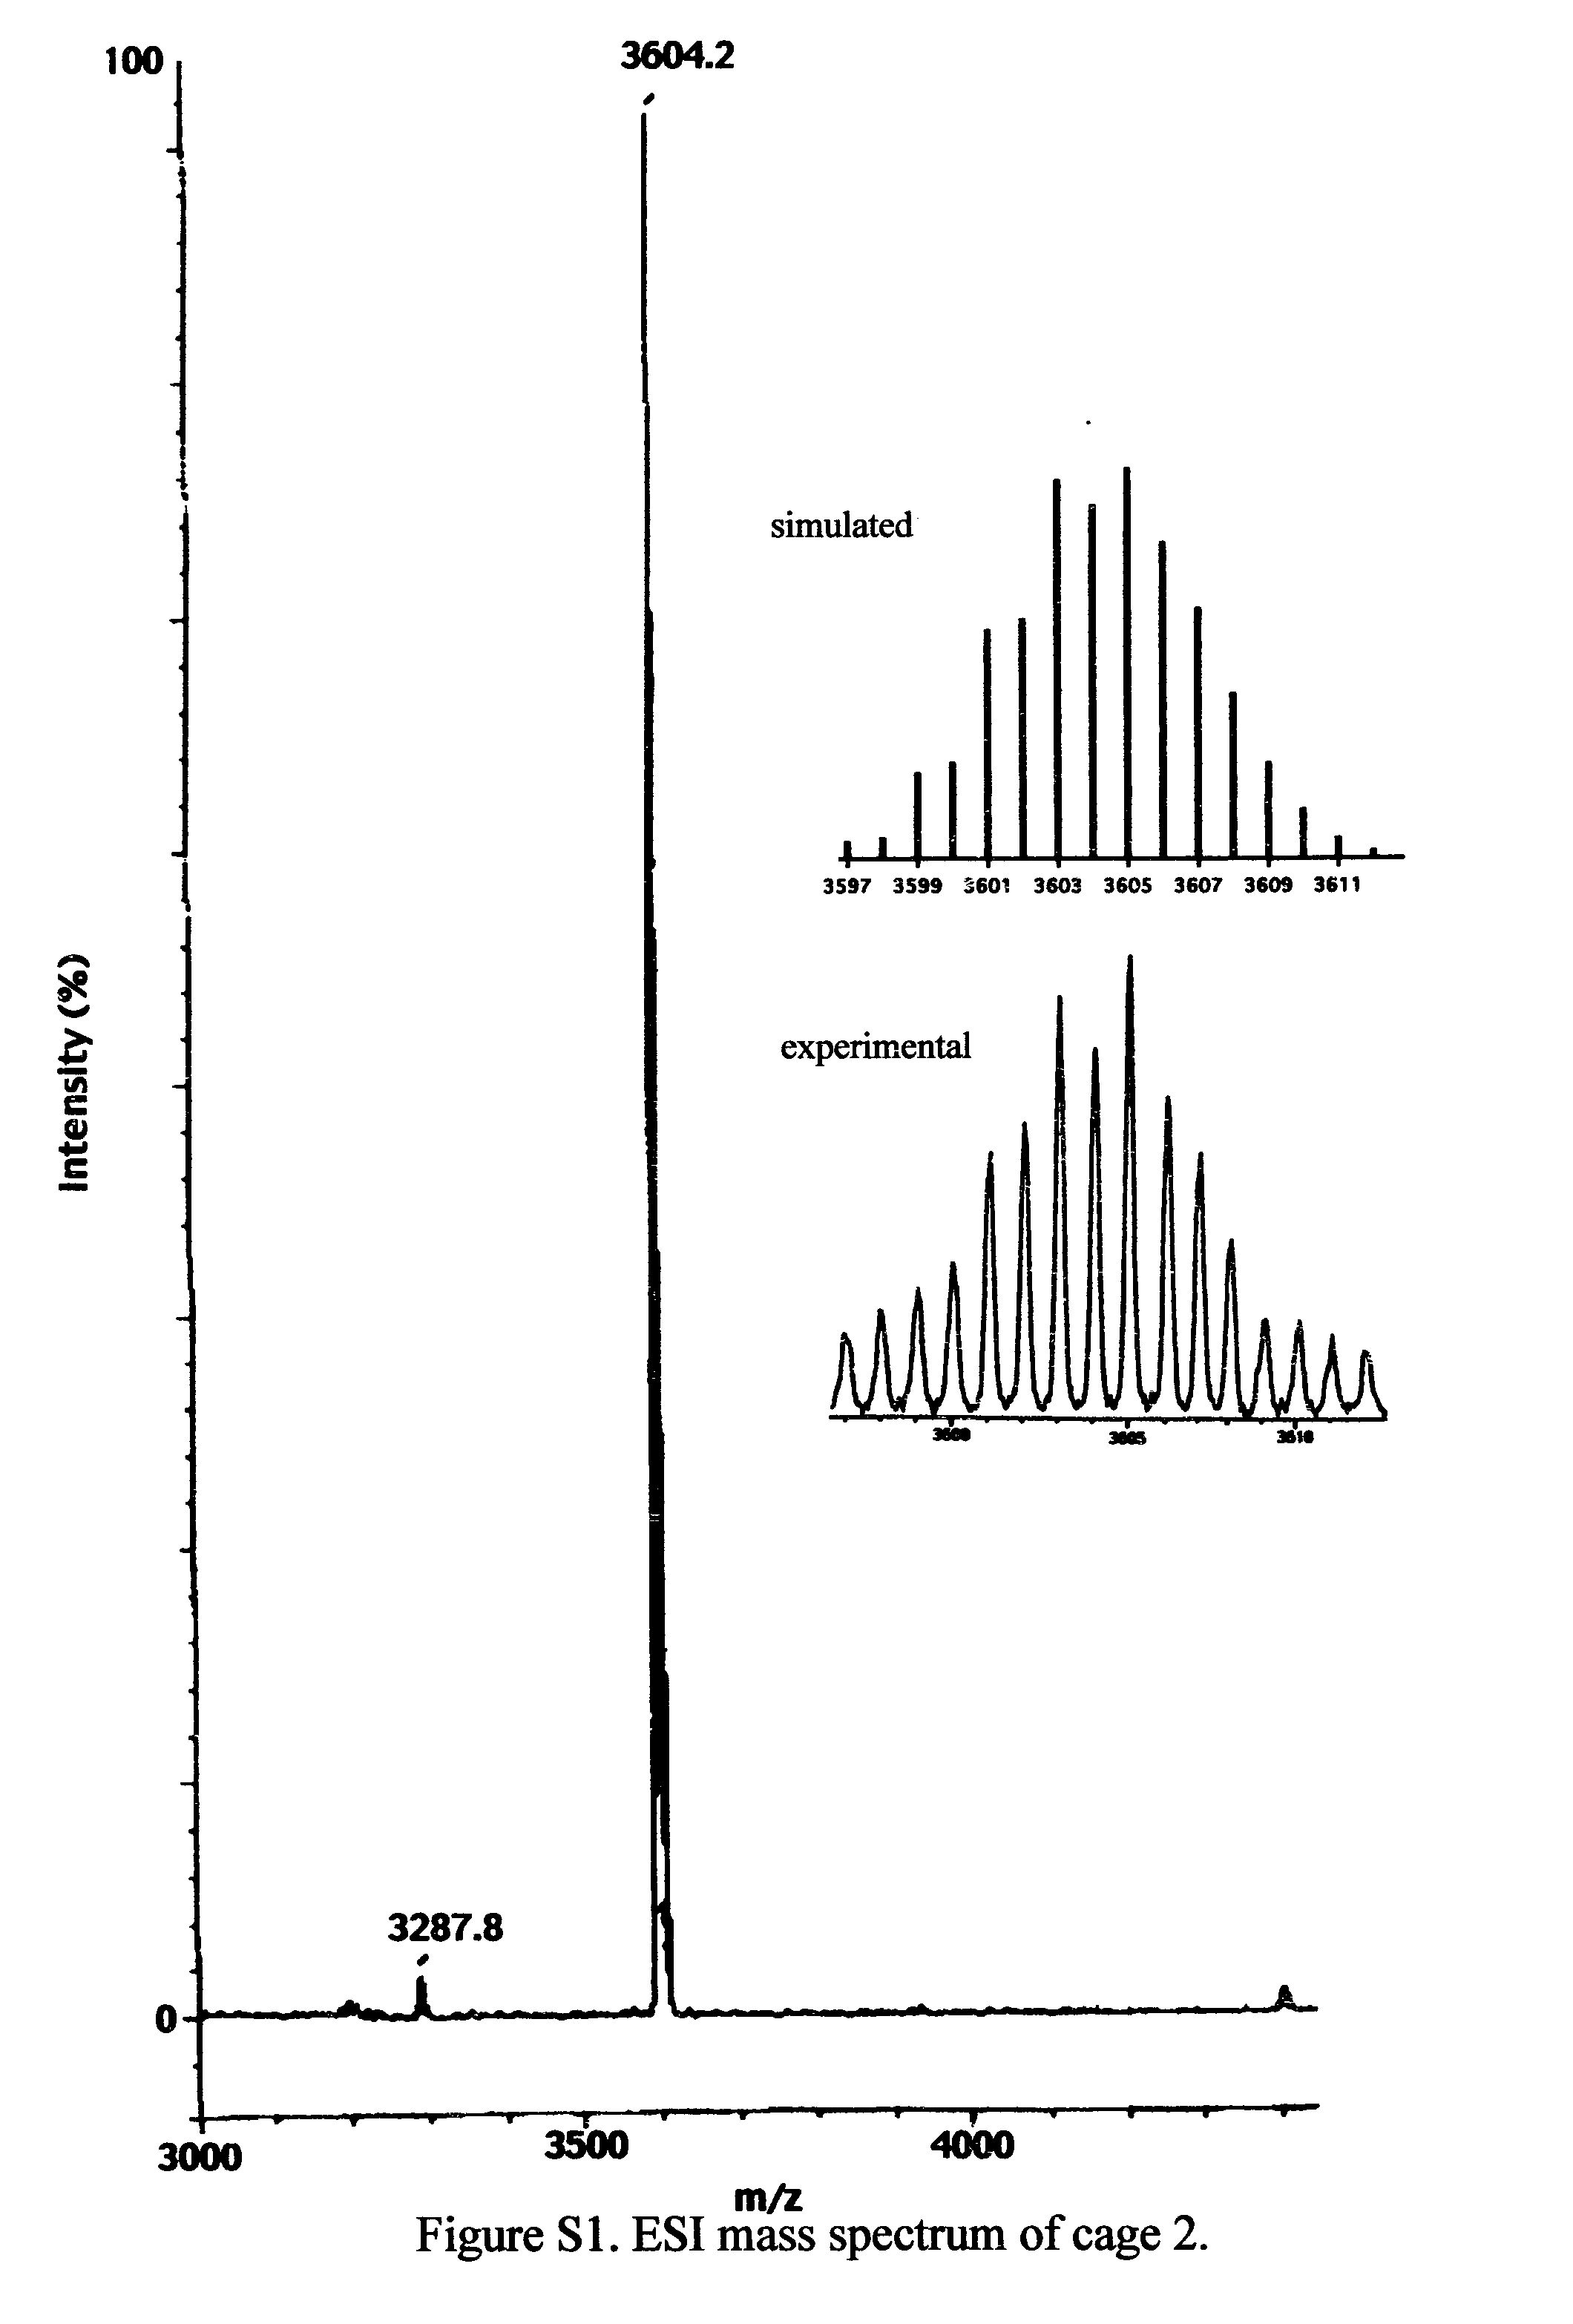

Supplement: b007658is1.doc [file b007658is1.doc]

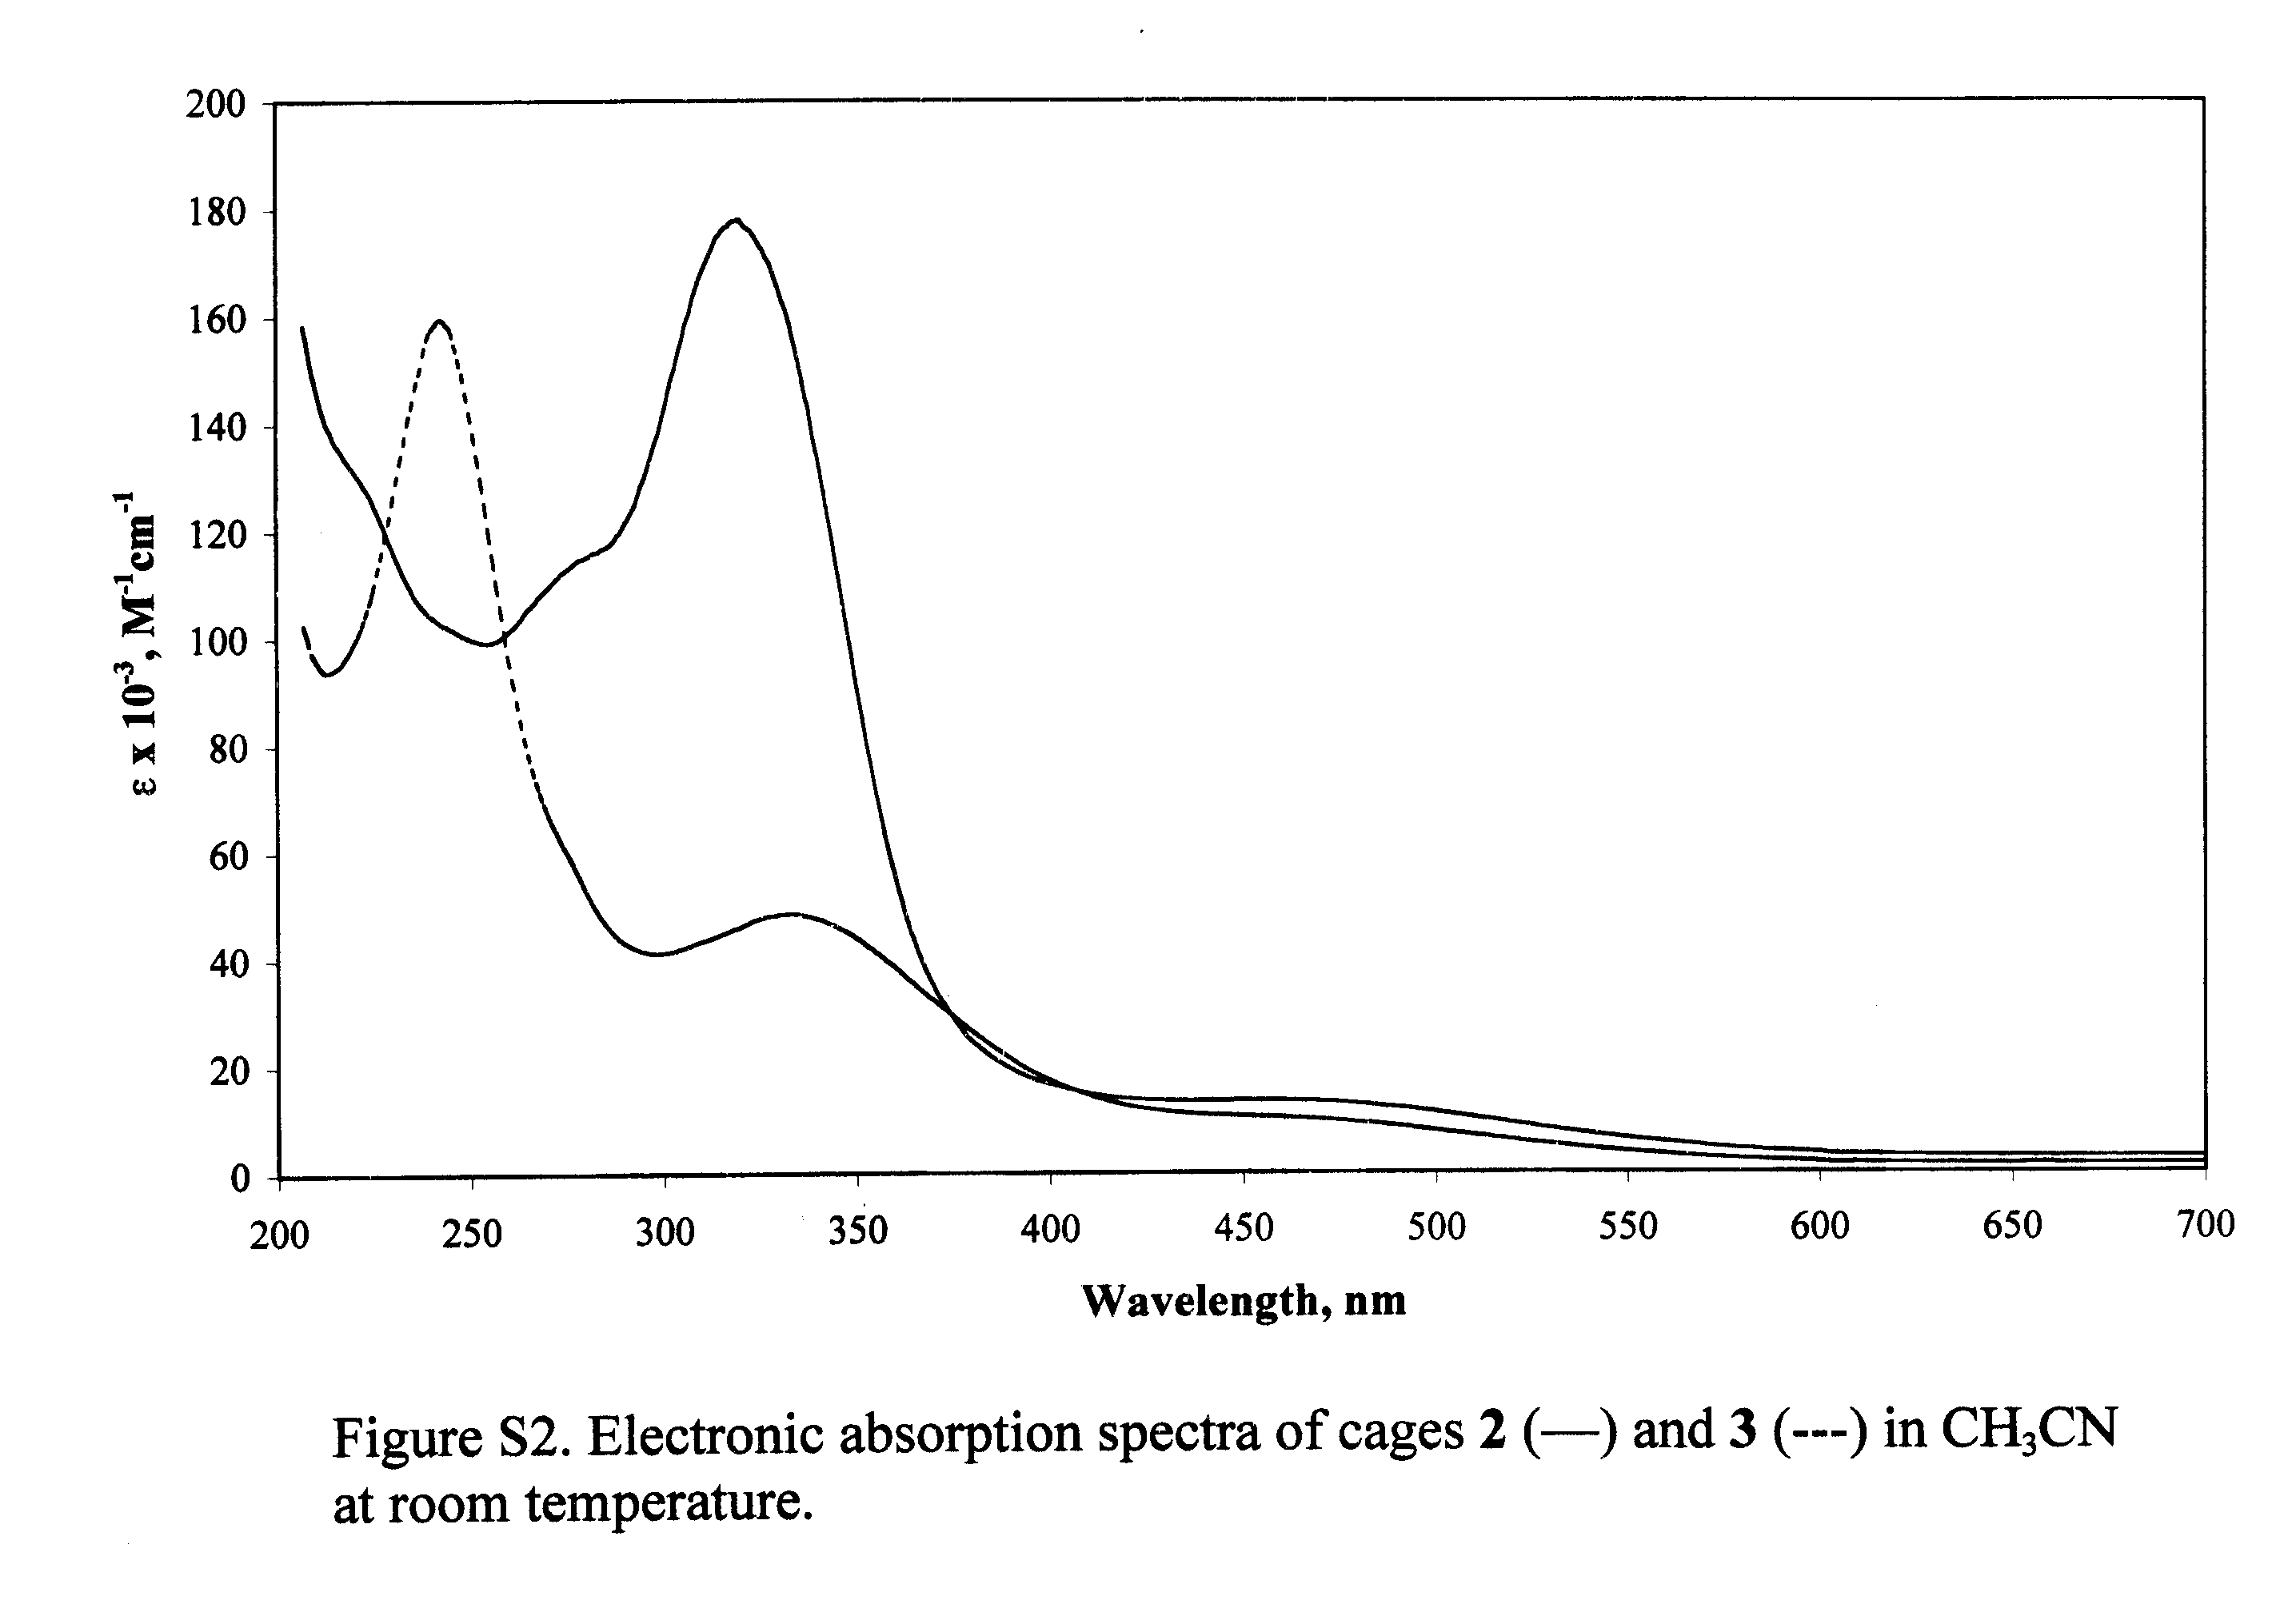

Supplement: b007658is2.doc [file b007658is2.doc]
